# Supplementary material for: Knowledge Gaps and Emergency Management Practices of Children’s Dental Trauma: A Cross-Sectional Survey Among Primary School Health Teachers and Parents in Urumqi
Source: Research Square preprint supplement (doi:10.21203/rs.3.rs-6387165/v1), 2025-04-29
Supplement: Supplementary file 1 [file 0fb4ae81b2f74516b345d913.docx]

**Emergency Management Protocol for Avulsed Permanent Teeth in Children**
*(Golden 30-Minute Window Guide)*

**Step 1: Immediate Action (<5 minutes)**

✅ **Correct Procedures**:
► Hold tooth by the *crown only* (never touch root)
► Rinse gently with *saline/milk* if dirty (no scrubbing)
► Attempt immediate replantation (for school nurses/doctors)

❌ **Common Parent Errors**:
× Wrapping in dry tissue
× Scrubbing root surface

**Step 2: Storage & Transport (If Replantation Failed)**

✅ **Storage Media Priority (IADT Standards)**:

1. **Saline**
2. **Milk**
3. **Child's saliva** (buccal vestibule，cheek space)

❌ **Critical Mistakes**:
× Storing in tap water/ice
× Letting tooth dry

**Step 3: Urgent Dental Care**

✅ **Time Sensitivity**:
► **<10min** 
► **Absolute max: 30min**

❌ **Risks of Delay**:
× Wait until pain stops

**Professional Treatment**

► Bring tooth *in storage medium*
► Report exact avulsion time (suggest adding to your questionnaire)

**"The ideal repositioning time for a displaced tooth depends on the injury type, but the golden rule is: THE SOONER THE BETTER. Below are critical timeframes and management protocols:**

**Key Timeframes by Injury Type**

1. **Complete Avulsion**
   - *Golden window*: **30min** for highest success
   - Max limit: **2hrs** (beyond this, periodontal cell necrosis occurs)
2. **Subluxation/Loosening**
   - Ideal: **<6hrs** for splinting
3. **Intrusive Luxation**
   - Evaluation needed within **24hrs**

**Critical Notes**

⚠ **Primary vs. Permanent Teeth**:

- Permanent teeth: Always attempt salvage
- Primary teeth: May require extraction if interfering with permanent buds

⚠ **Handling Precautions**:

- Never hold by root surface
- Even if beyond ideal time, still seek urgent care for:
  - Jaw fractures
  - Uncontrolled bleeding

**Summary**:
**Optimal survival**: Replantation within **30min-2hrs**, but *immediate action is critical*. Clinical assessment required for individualized management.
